# Supplementary material for: Spectroscopic, Thermal, Microbiological, and Antioxidant Study of Alkali Metal 2-Hydroxyphenylacetates
Source: MDPI journal article supplement (doi:10.3390/ma14247824), 2021-12-17
Supplement: s1 [file s1]

---

*Supplementary*

# **Spectroscopic, Thermal, Microbiological, and Antioxidant Study of Alkali metal 2-Hydroxyphenylacetates**

**Mariola Samsonowicz <sup>1,\*</sup>, Ewelina Gołębiewska <sup>1</sup>, Elżbieta Wołejko <sup>1</sup>, Urszula Wydro <sup>1</sup>, Grzegorz Świdorski <sup>1</sup>, Joanna Zwolińska <sup>2</sup>, Monika Kalinowska <sup>1</sup> and Włodzimierz Lewandowski <sup>1</sup>**

<sup>1</sup> Department of Chemistry, Biology and Biotechnology, Institute of Civil Engineering and Energetics, Faculty of Civil Engineering and Environmental Science, Białystok University of Technology, Wiejska 45E Street, 15-351 Białystok, Poland; e.golebiewska@pb.edu.pl (E.G.); e.wolejko@pb.edu.pl (E.W.); u.wydro@pb.edu.pl (U.W.); g.swiderski@pb.edu.pl (G.S.); m.kalinowska@pb.edu.pl (M.K.); w-lewando@wp.pl (W.L.)

<sup>2</sup> Centre for Advanced Technologies, Adam Mickiewicz University, Uniwersytetu Poznańskiego 10 Street, 61-614 Poznań, Poland; joakol1@amu.edu.pl

\* Correspondence: m.samsonowicz@pb.edu.pl

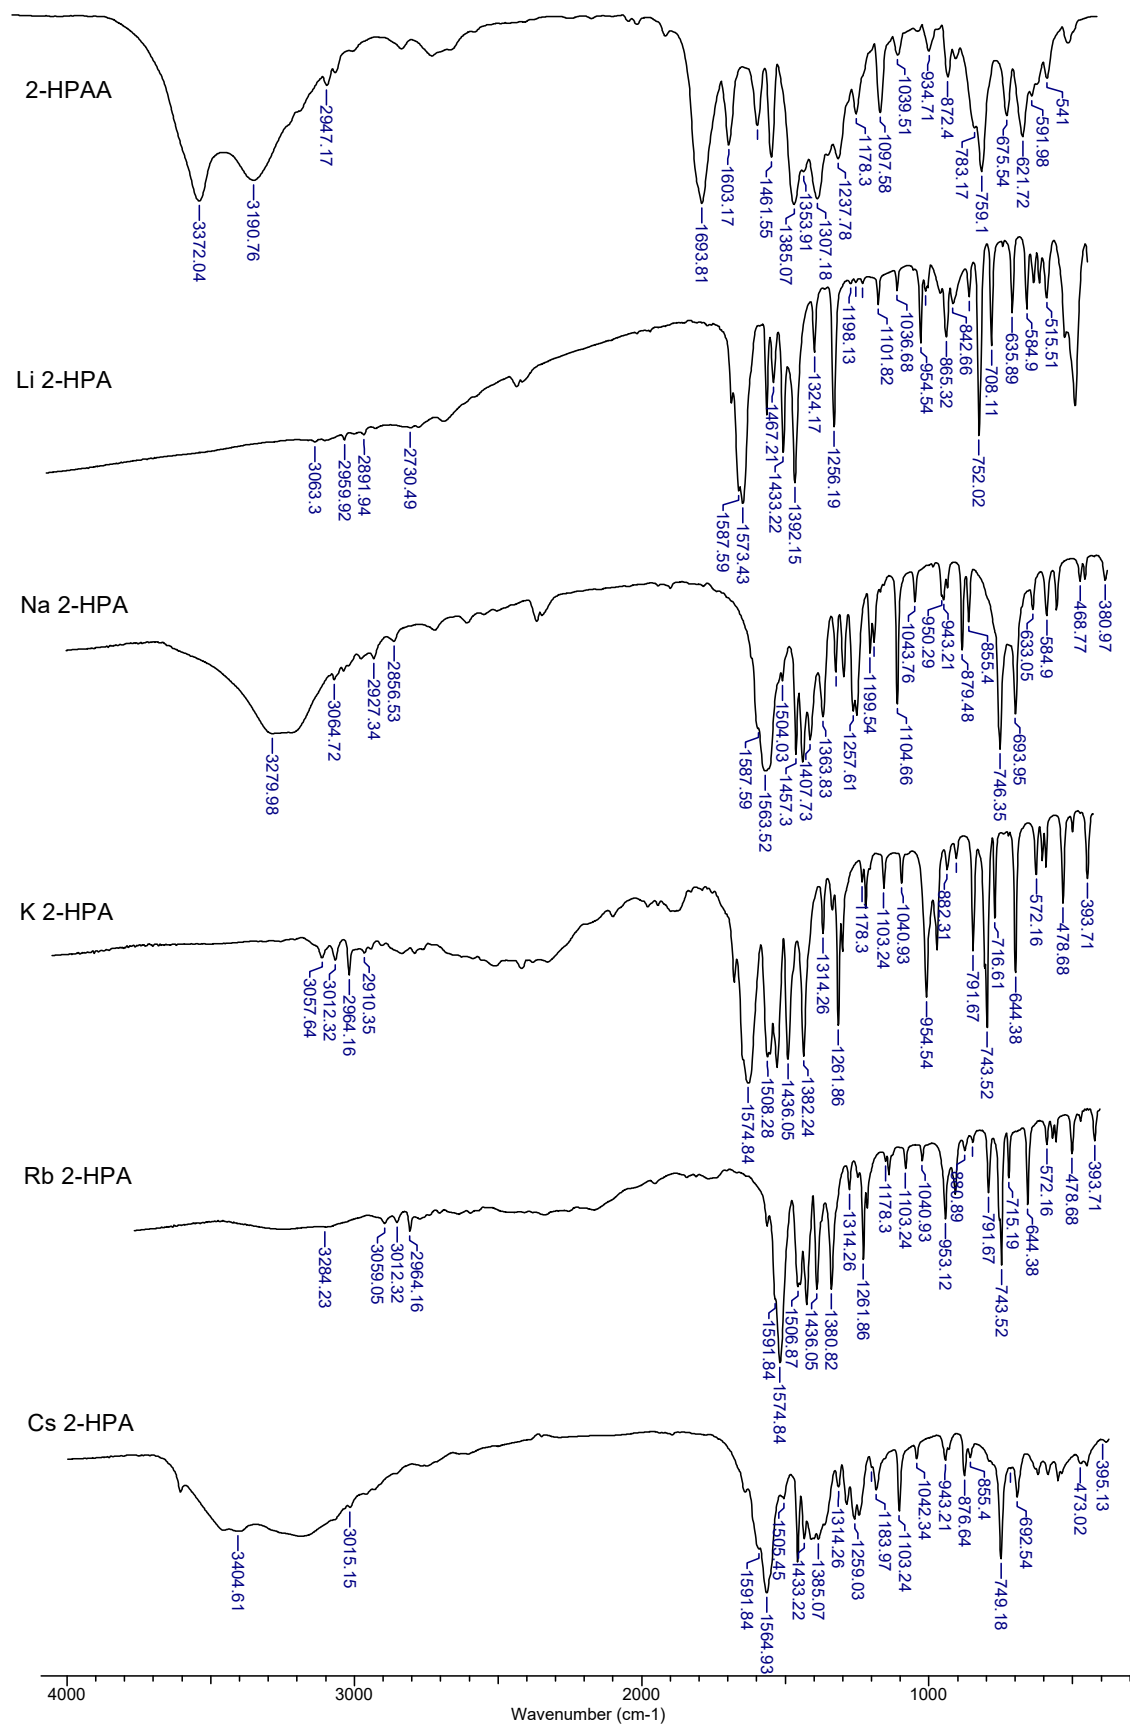

Figure S1. The FT-IR spectra of 2-HPAA and its alkali metal 2-hydroxyphenylacetates.

(a)

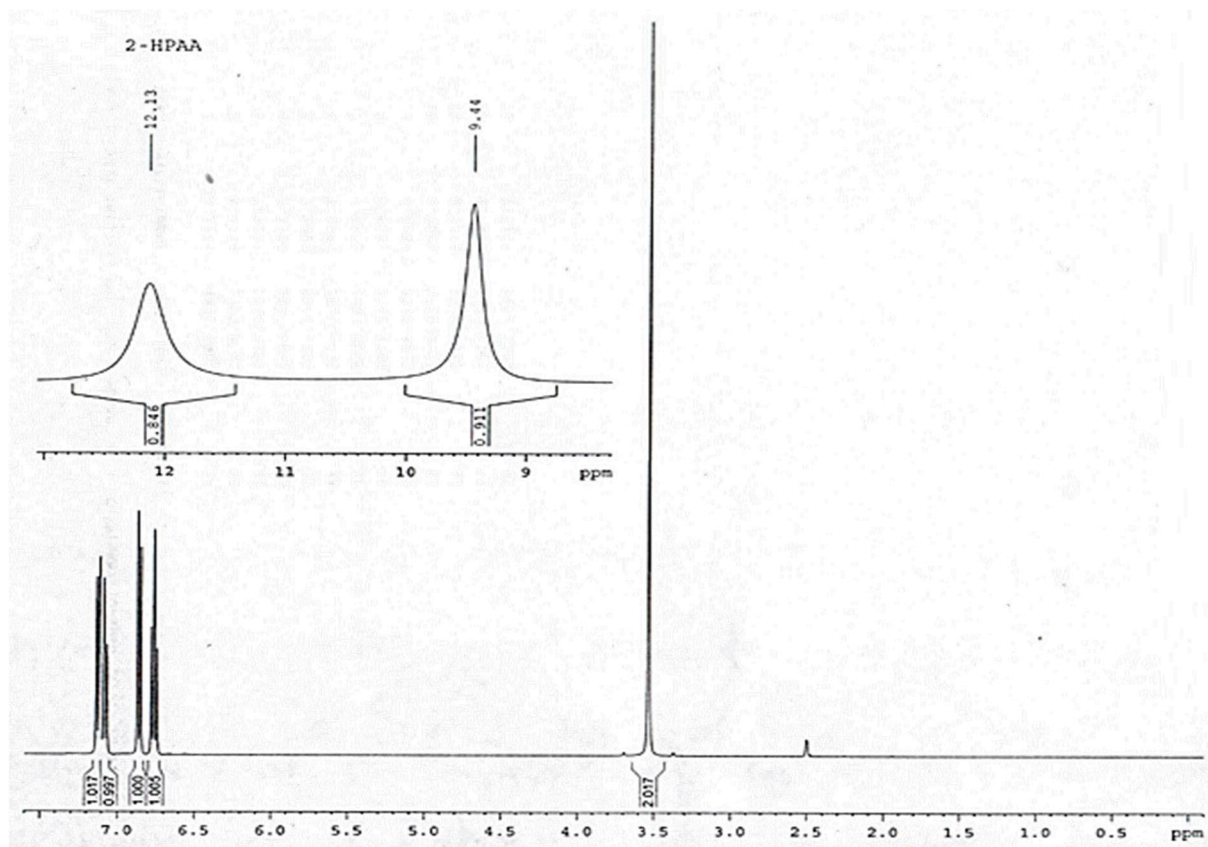

(b)

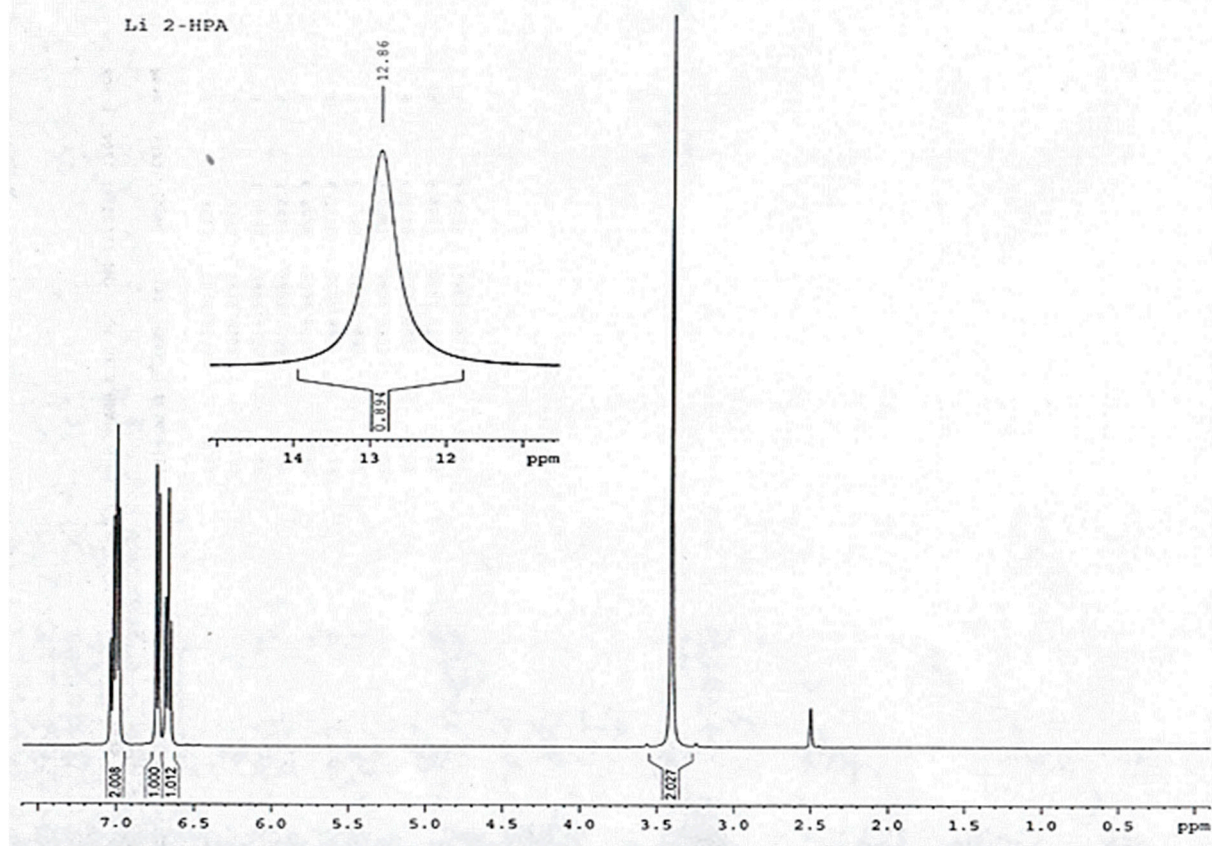

(c)

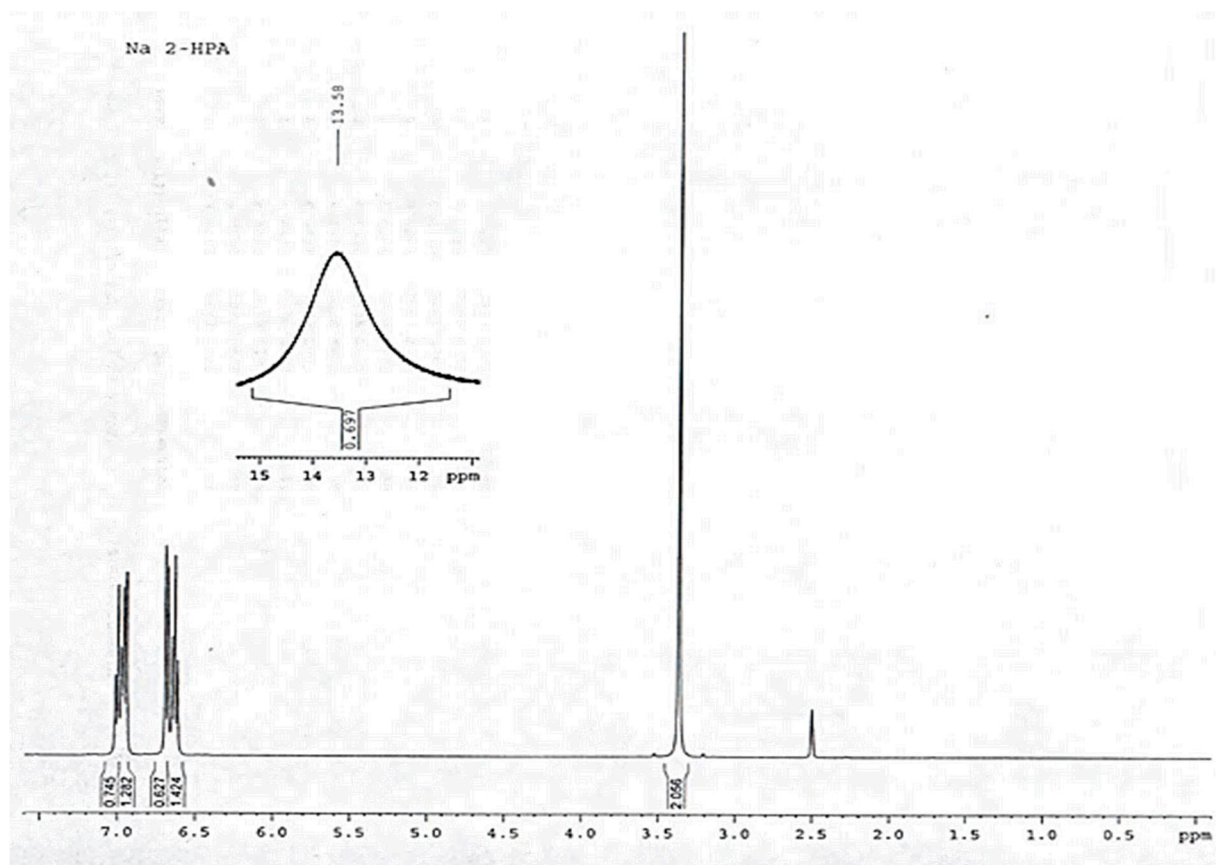

(d)

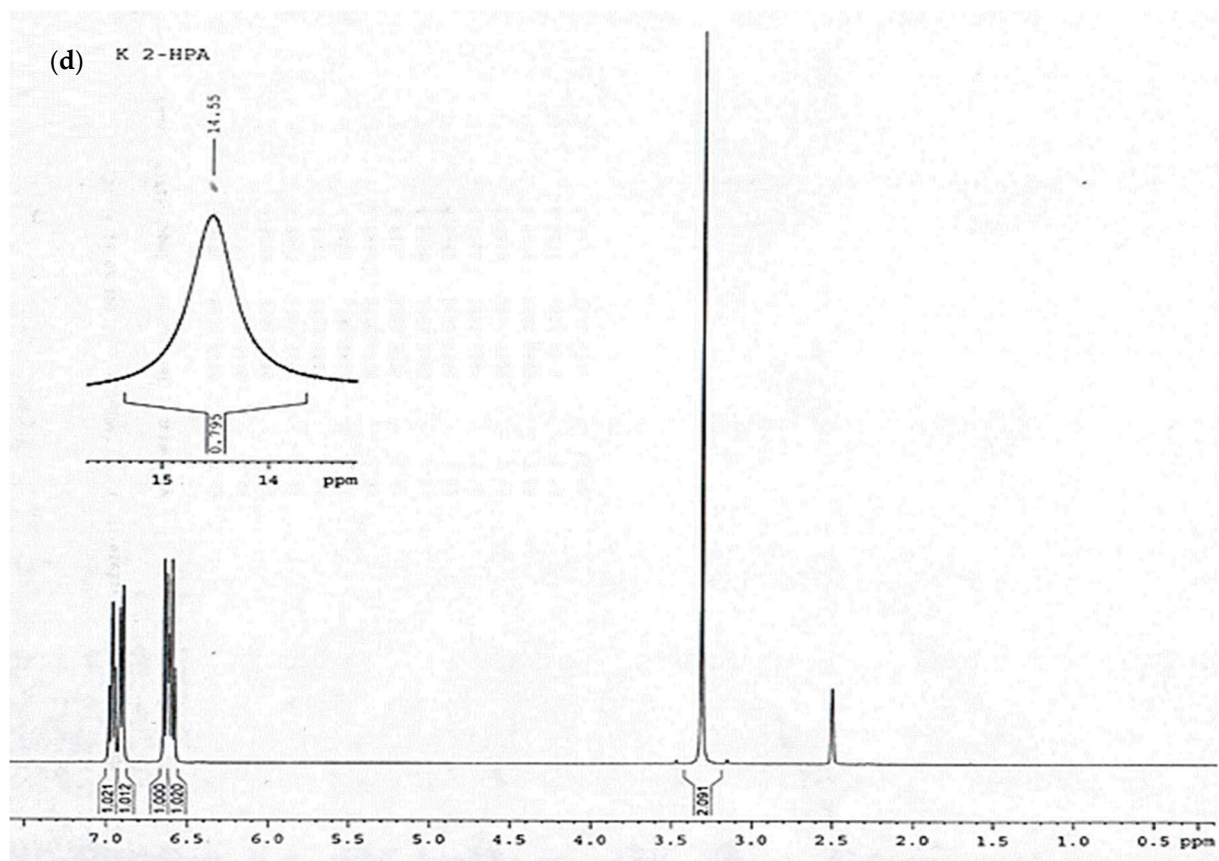

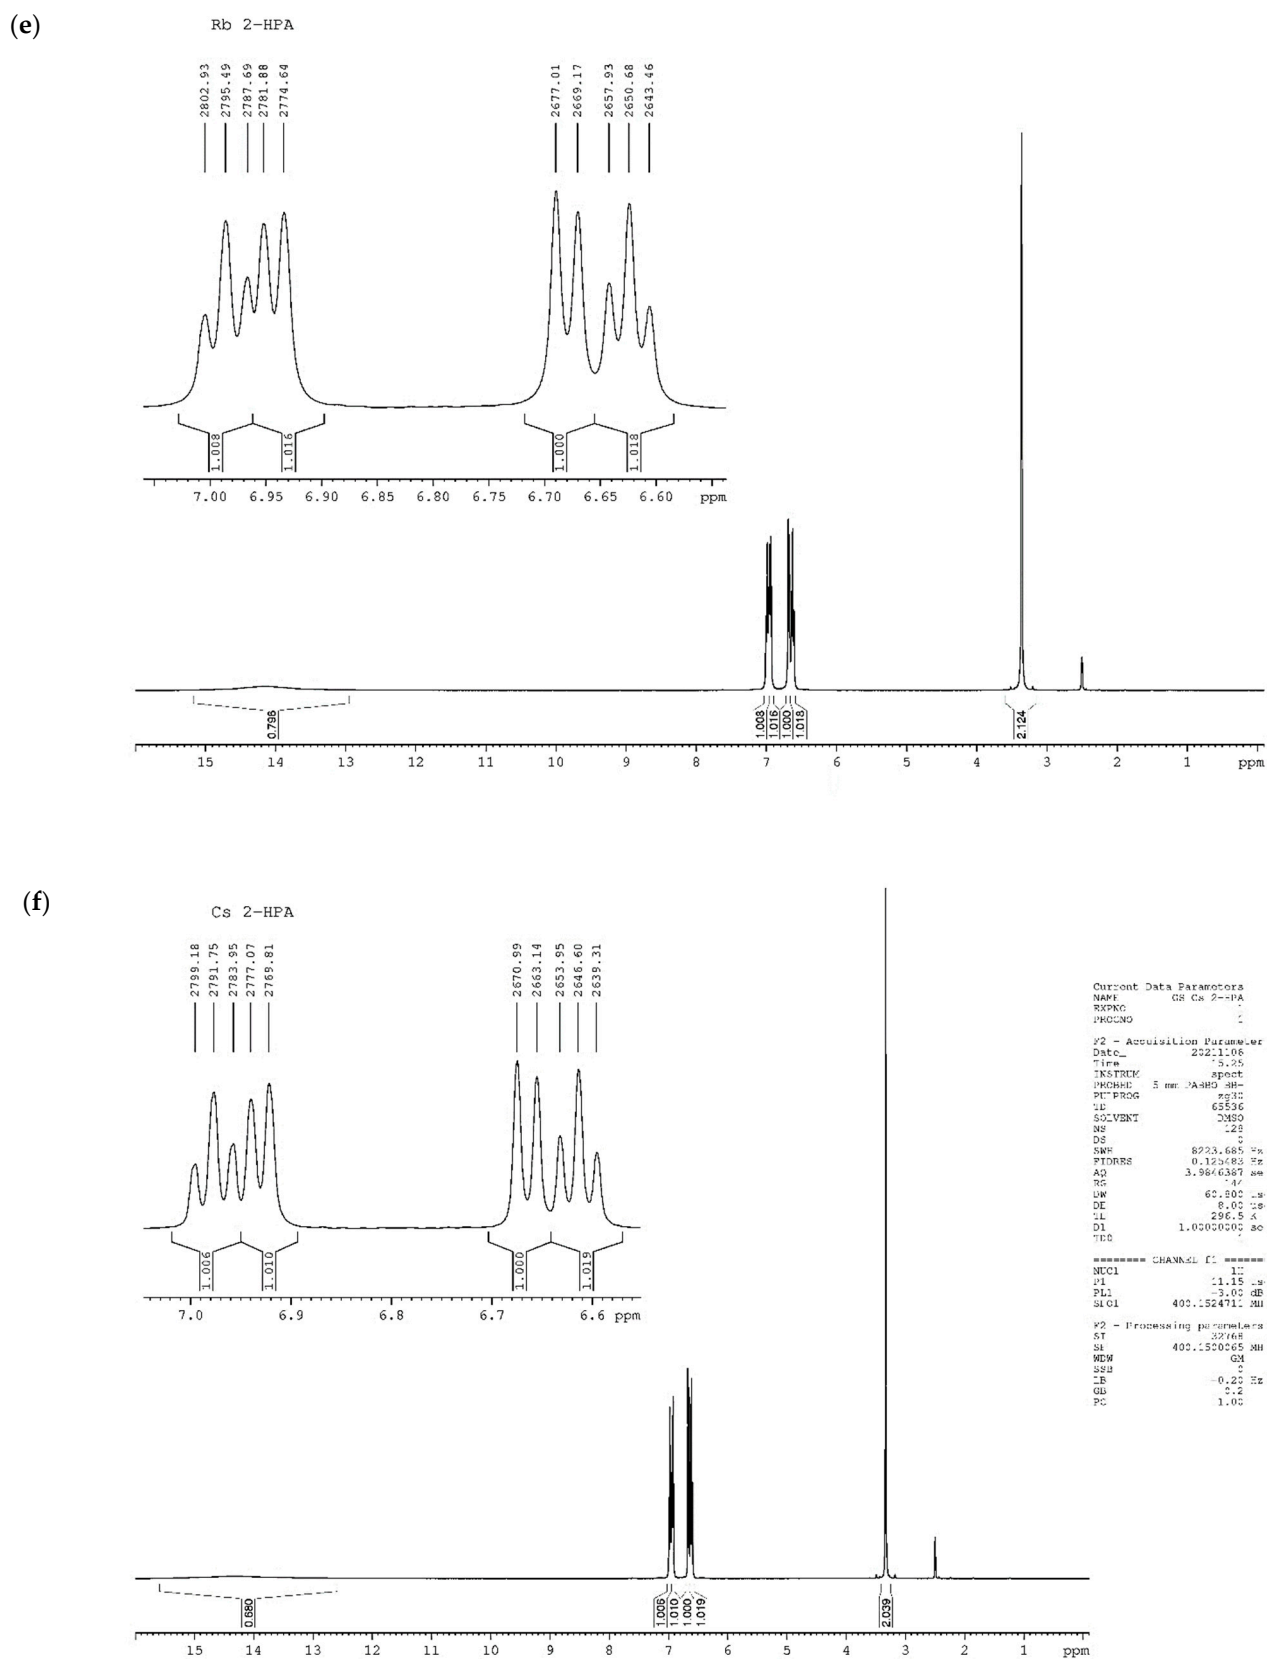

Figure S2. The  $^1\text{H}$  NMR spectra of 2-HPAA (a) and its alkali metal salts (b-f).



(a)

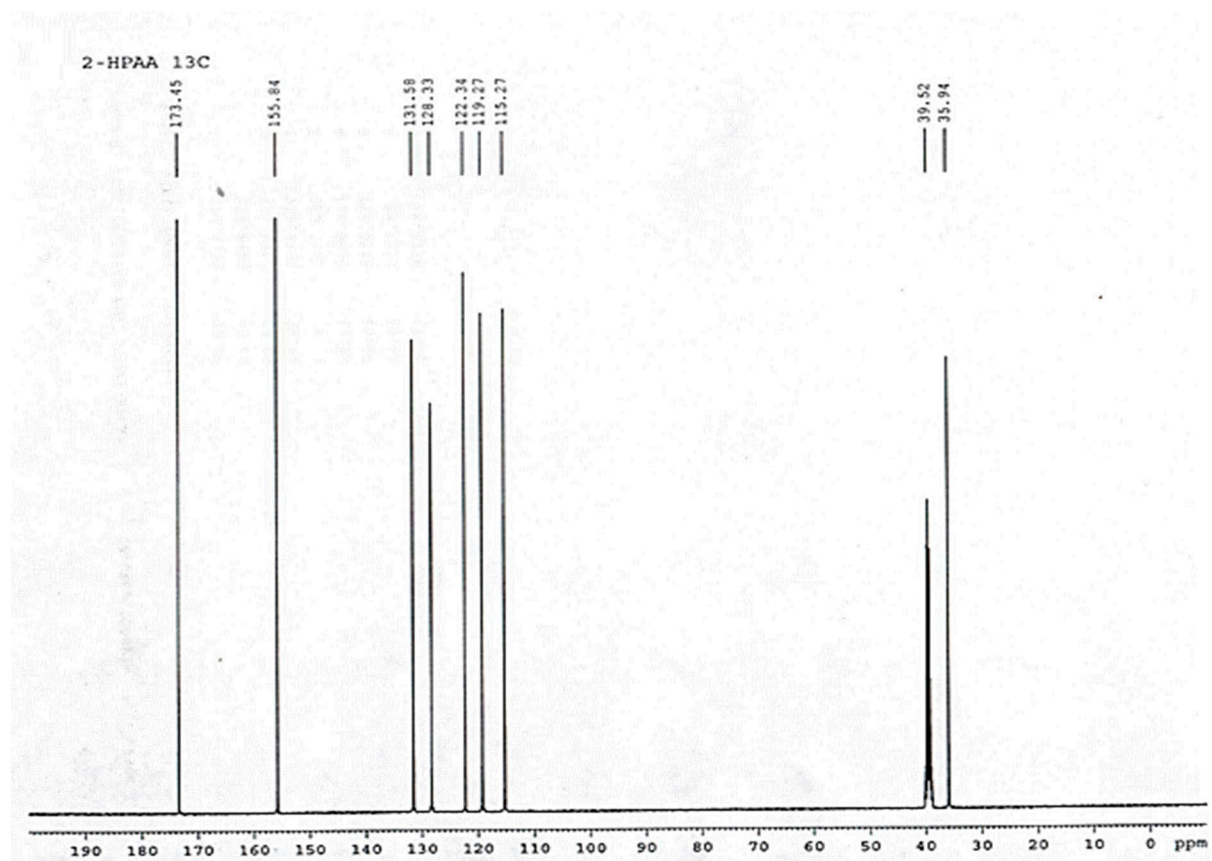

(b)

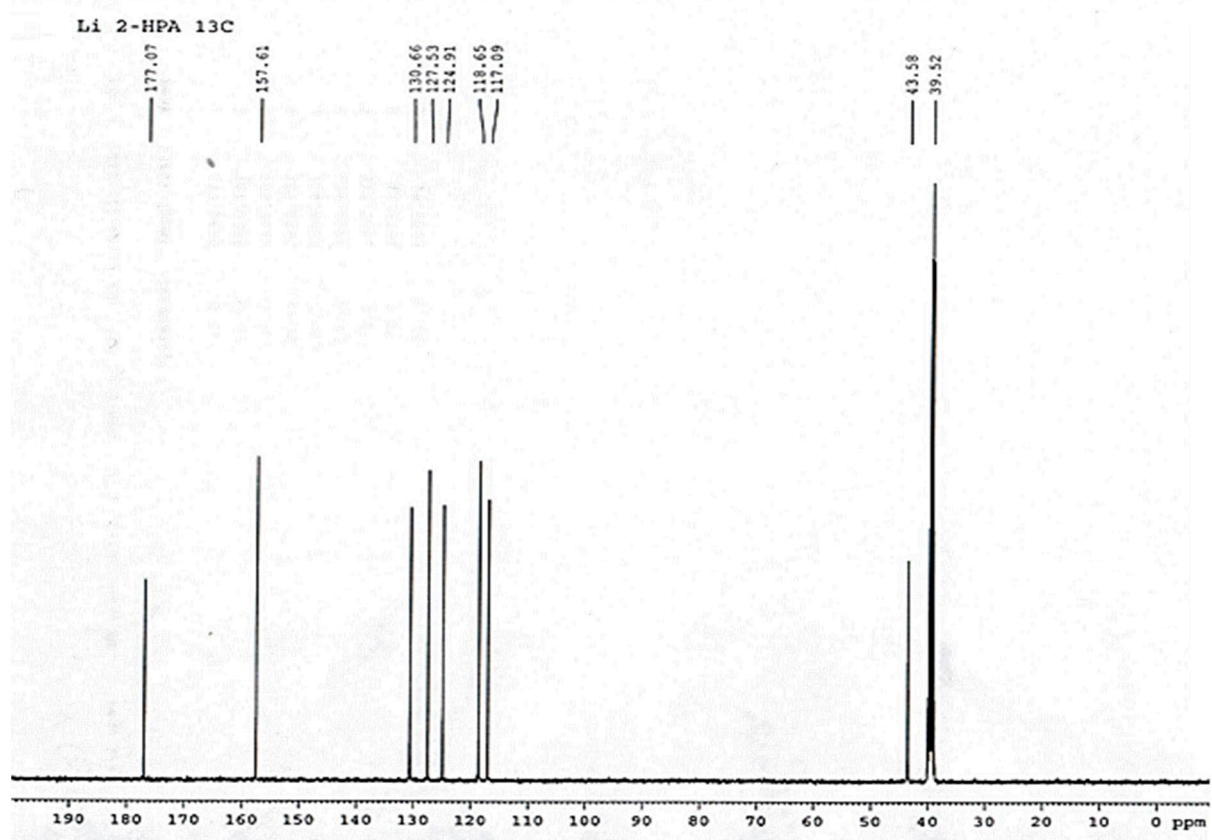

(c)

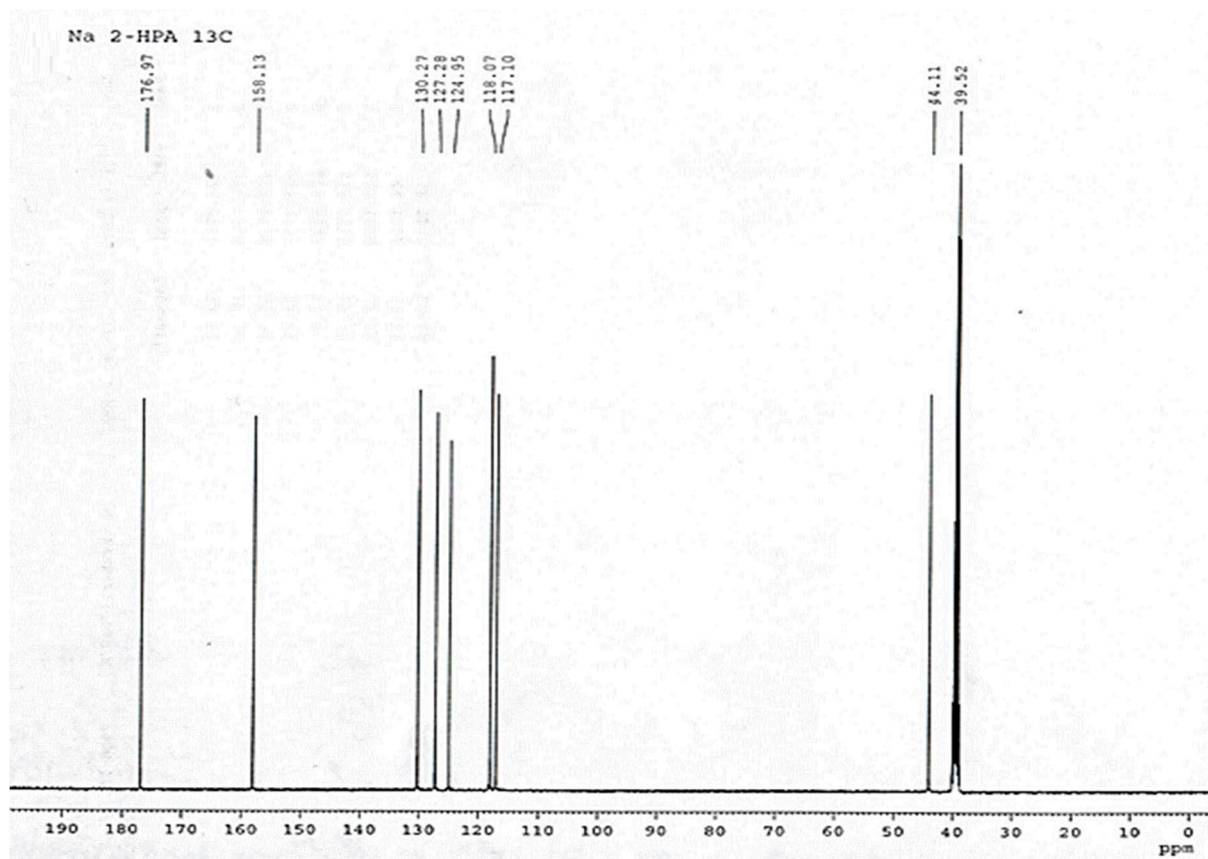

(d)

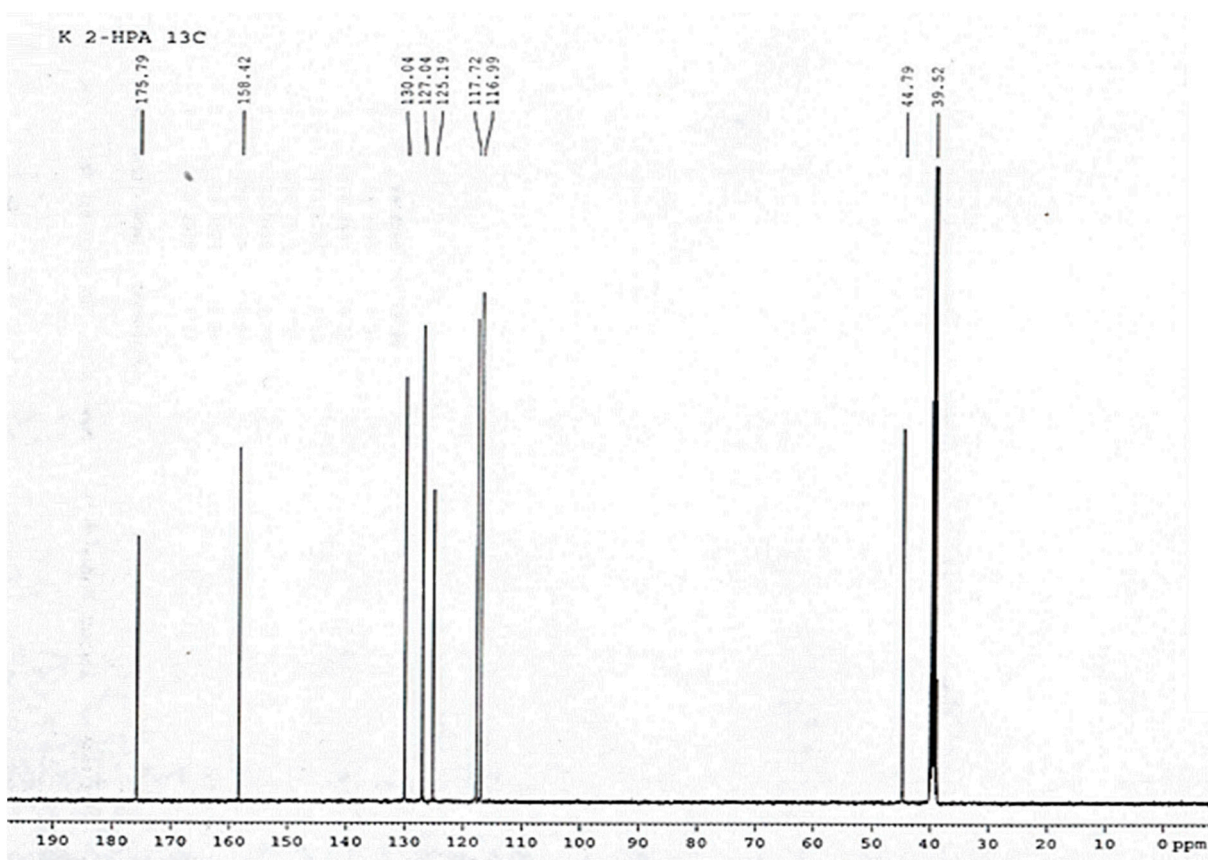

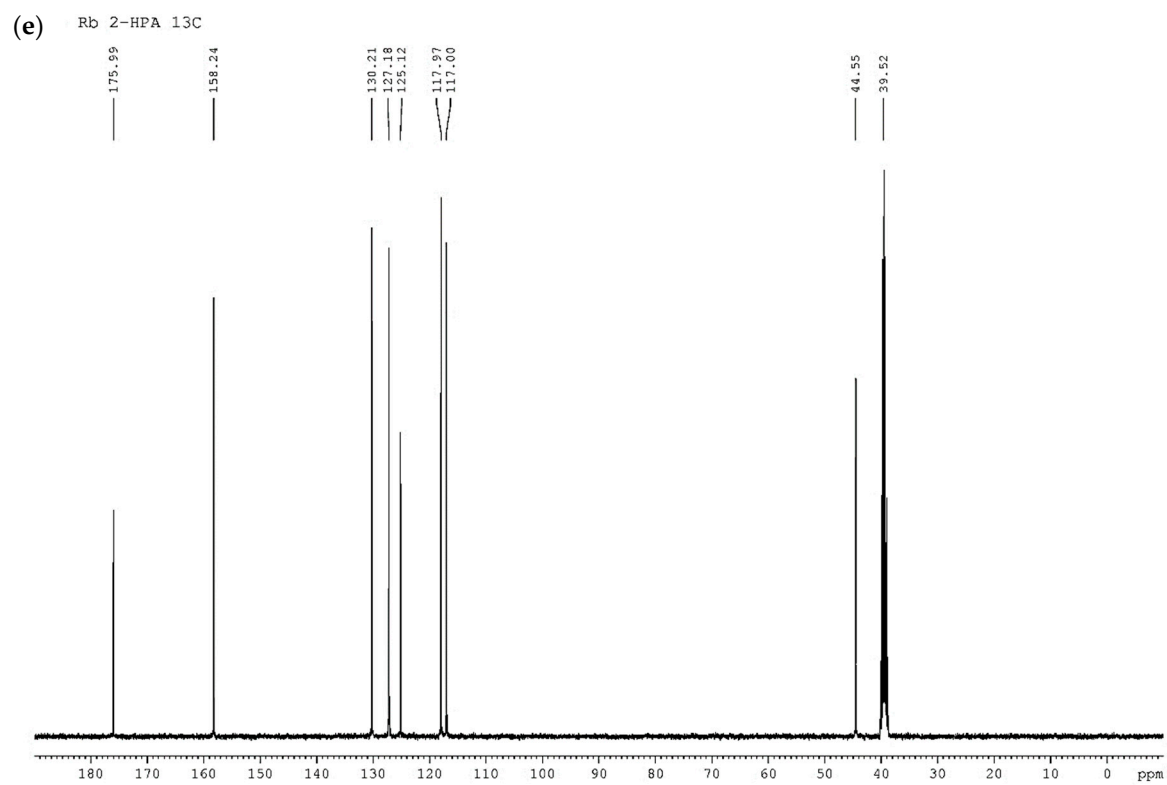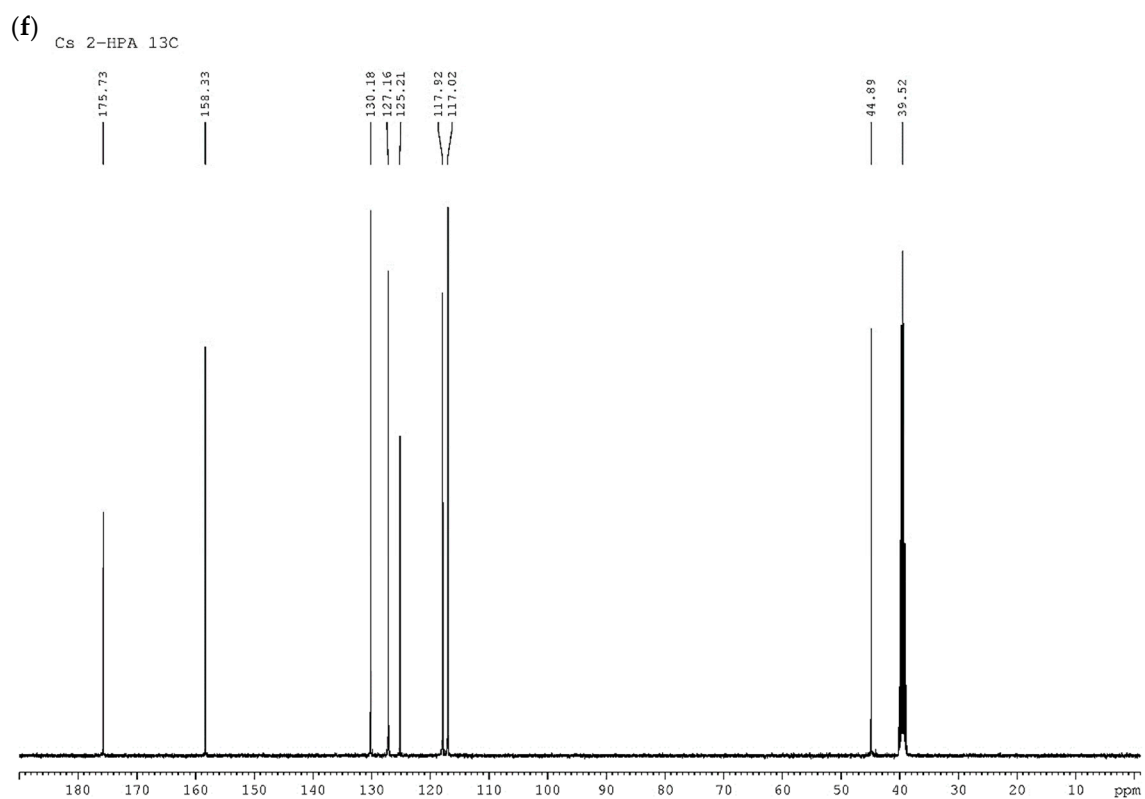

**Figure S3.** The  $^{13}\text{C}$  NMR spectra of 2-HPAA (a) and its alkali metal 2-hydroxyphenylacetates (b–f).



**Table S1.** Proton  $^1\text{H}$  and carbon  $^{13}\text{C}$  shifts for 2-hydroxyphenylacetic acid and 2-hydroxyphenylacetates.

|                     | 2-HPAA | Li 2-HPA | Na 2-HPA | K 2-HPA | Rb 2-HPA | Cs 2-HPA |
|---------------------|--------|----------|----------|---------|----------|----------|
| $^1\text{H}$ NMR    |        |          |          |         |          |          |
| H(16)               | 12.13  | 12.86    | 13.58    | 14.55   | 14.15    | 14.33    |
| H(19)               | 9.44   | -        | -        | -       | -        | -        |
| H(7)                | 7.12   | 7.02     | 7.01     | 6.98    | 7.00     | 6.99     |
| H(9)                | 7.08   | 6.99     | 6.95     | 6.95    | 6.97     | 6.96     |
| H(8)                | 6.86   | 6.74     | 6.68     | 6.63    | 6.68     | 6.66     |
| H(17)               | 6.76   | 6.67     | 6.63     | 6.60    | 6.62     | 6.61     |
| H(11, 12)           | 3.53   | 3.41     | 3.37     | 3.31    | 3.36     | 3.34     |
| $^{13}\text{C}$ NMR |        |          |          |         |          |          |
| C(13)               | 173.45 | 177.07   | 176.97   | 175.79  | 175.99   | 175.73   |
| C(5)                | 155.86 | 157.61   | 158.13   | 158.42  | 158.24   | 158.33   |
| C(3)                | 131.58 | 130.66   | 130.27   | 130.04  | 130.21   | 130.18   |
| C(1)                | 128.33 | 127.53   | 127.28   | 127.04  | 127.18   | 127.16   |
| C(2)                | 122.34 | 124.91   | 124.95   | 125.19  | 125.12   | 125.21   |
| C(4)                | 119.27 | 118.65   | 118.07   | 117.72  | 117.97   | 117.92   |
| C(6)                | 115.27 | 117.08   | 117.10   | 116.99  | 117.00   | 117.02   |
| C(10)               | 39.52  | 43.58    | 44.11    | 44.79   | 44.54    | 44.89    |

**Table S2.** The selected bond lengths ( $\text{\AA}$ ) and angles ( $^\circ$ ) between bonds in 2-HPAA and its alkali metal 2-hydroxyphenylacetates.

| Atom Numbers*       | 2-HPAA                        | Li 2-HPA | Na 2-HPA | K 2-HPA |
|---------------------|-------------------------------|----------|----------|---------|
|                     | Bond Lengths ( $\text{\AA}$ ) |          |          |         |
| C10-C13             | 1.519                         | 1.529    | 1.539    | 1.543   |
| C13-O14             | 1.203                         | 1.268    | 1.263    | 1.261   |
| C13-O15             | 1.359                         | 1.273    | 1.268    | 1.267   |
| O15-H16/M           | 0.969                         | 1.853    | 2.207    | 2.154   |
| O14-H16/M           | 2.290                         | 1.857    | 2.208    | 2.516   |
| Angles ( $^\circ$ ) |                               |          |          |         |
| C3-C4-C5            | 118.14                        | 117.74   | 117.55   | 117.13  |
| C4-C10-C13          | 111.10                        | 115.58   | 115.81   | 115.81  |
| C10-C13-O14         | 126.92                        | 120.88   | 119.68   | 119.35  |
| C10-C13-O15         | 110.55                        | 117.81   | 116.42   | 116.07  |
| C13-O15-H16/M       | 106.98                        | 82.72    | 87.62    | 91.21   |
| C13-O14-H16/M       | 55.30                         | 82.67    | 87.66    | 91.27   |

\* Atom numbers according to Figure 2.

**Table S3.** Data of NBO and Mulliken atomic charge analysis for 2-HPAA and its alkali metal 2-hydroxyphenylacetates.

| Atom  | Charge (e <sup>1</sup> ) |          |          |          |          |          |         |          |
|-------|--------------------------|----------|----------|----------|----------|----------|---------|----------|
|       | 2-HPAA                   |          | Li 2-HPA |          | Na 2-HPA |          | K 2-HPA |          |
|       | NBO                      | Mulliken | NBO      | Mulliken | NBO      | Mulliken | NBO     | Mulliken |
| C1    | -0.182                   | -0.188   | -0.190   | -0.219   | -0.194   | -0.235   | -0.196  | -0.233   |
| C2    | -0.227                   | -0.439   | -0.229   | -0.434   | -0.231   | -0.445   | -0.231  | -0.456   |
| C3    | -0.169                   | -0.418   | -0.171   | -0.381   | -0.172   | -0.317   | -0.173  | -0.300   |
| C4    | -0.076                   | 0.913    | -0.064   | 0.960    | -0.058   | 1.023    | -0.054  | 1.033    |
| C5    | 0.327                    | -0.250   | 0.325    | -0.274   | 0.324    | -0.383   | 0.323   | -0.472   |
| C6    | -0.274                   | -0.173   | -0.278   | -0.184   | -0.280   | -0.191   | -0.821  | -0.199   |
| H7    | 0.205                    | 0.157    | 0.202    | 0.150    | 0.201    | 0.146    | 0.200   | 0.144    |
| H8    | 0.206                    | 0.164    | 0.203    | 0.159    | 0.201    | 0.156    | 0.200   | 0.154    |
| H9    | 0.202                    | 0.145    | 0.199    | 0.146    | 0.198    | 0.144    | 0.197   | 0.140    |
| H10   | -0.500                   | -0.212   | -0.497   | 0.012    | -0.497   | 0.093    | -0.500  | -0.009   |
| H11   | 0.236                    | 0.211    | 0.228    | 0.192    | 0.222    | 0.183    | 0.219   | 0.173    |
| H12   | 0.248                    | 0.250    | 0.242    | 0.243    | 0.238    | 0.231    | 0.235   | 0.221    |
| C13   | 0.817                    | -0.197   | 0.785    | -0.132   | 0.784    | -0.189   | 0.786   | -0.334   |
| O14   | -0.591                   | -0.259   | -0.828   | -0.300   | -0.815   | -0.434   | -0.818  | -0.467   |
| O15   | -0.695                   | -0.157   | -0.844   | -0.329   | -0.830   | -0.452   | -0.834  | -0.485   |
| H16/M | 0.482                    | 0.274    | 0.933    | 0.223    | 0.931    | 0.517    | 0.952   | 0.940    |
| H17   | 0.161                    | 0.131    | 0.196    | 0.125    | 0.194    | 0.261    | 0.193   | 0.258    |
| O18   | -0.681                   | -0.225   | -0.680   | -0.224   | -0.680   | -0.227   | -0.680  | -0.226   |
| H19   | 0.471                    | 0.272    | 0.466    | 0.266    | 0.464    | 0.121    | 0.463   | 0.118    |

$$^1 e = 1.6021892 \cdot 10^{-19} .$$

**Table S4.** Change of electron charge in the carboxylic anion -COO<sup>-</sup> depending on the metal attached (calculated by NBO and Mulliken method).

| Atom              | Charge (e <sup>1</sup> ) |          |          |          |          |          |         |          |
|-------------------|--------------------------|----------|----------|----------|----------|----------|---------|----------|
|                   | 2-HPAA                   |          | Li 2-HPA |          | Na 2-HPA |          | K 2-HPA |          |
|                   | NBO                      | Mulliken | NBO      | Mulliken | NBO      | Mulliken | NBO     | Mulliken |
| C13               | 0.817                    | -0.197   | 0.785    | -0.132   | 0.784    | -0.189   | 0.786   | -0.334   |
| C14               | -0.591                   | -0.259   | -0.828   | -0.300   | -0.815   | -0.434   | -0.818  | -0.467   |
| C15               | -0.695                   | -0.157   | -0.844   | -0.329   | -0.830   | -0.452   | -0.834  | -0.485   |
| -COO <sup>-</sup> | -0.469                   | -0.613   | -0.887   | -0.761   | -0.861   | -1.075   | -0.866  | -1.286   |
